# Supplementary material for: Molecular and Biochemical Characterization, Antimicrobial Activity, Stress Tolerance, and Plant Growth-Promoting Effect of Endophytic Bacteria Isolated from Wheat Varieties
Source: MDPI journal article supplement (doi:10.3390/microorganisms10010021), 2021-12-23
Supplement: s1 [file s1]

# Molecular and Biochemical Characterization, Antimicrobial Activity, Stress Tolerance, and Plant Growth-Promoting Effect of Endophytic Bacteria Isolated from Wheat Varieties

Dawood Shah, M. Sayyar Khan Kazi, Shahkaar Aziz, Haidar Ali, and Lorenzo Pecoraro

**Table S1.** Biochemical Characterization of the endophytic bacteria isolated from different varieties of wheat.

| Isolated Strains | Catalase Activity | IAA Production | Phosphate Solubilization | Siderophore Production |
|------------------|-------------------|----------------|--------------------------|------------------------|
| GI-1             | +                 | +++            | +                        | +                      |
| GI-6             | +++               | ++             | ++                       | ++                     |
| S-5              | ++                | +              | +                        | -                      |
| S-7              | ++                | +              | -                        | -                      |
| AH-1             | -                 | -              | -                        | -                      |

- Absence of activity, + less activity, ++ moderate activity, +++ high activity

**Table S2.** Nitrogen assimilation activity of isolated strains.

| Tested Medium            | Isolates |      |     |     |      |
|--------------------------|----------|------|-----|-----|------|
|                          | GI-1     | GI-6 | S-5 | S-7 | AH-1 |
| Jensen N free agar media | +        | ++   | +   | -   | +++  |
| Ashby N free media       | -        | ++   | +   | -   | +++  |

- Absence of activity, + less activity, ++ moderate activity, +++ high activity

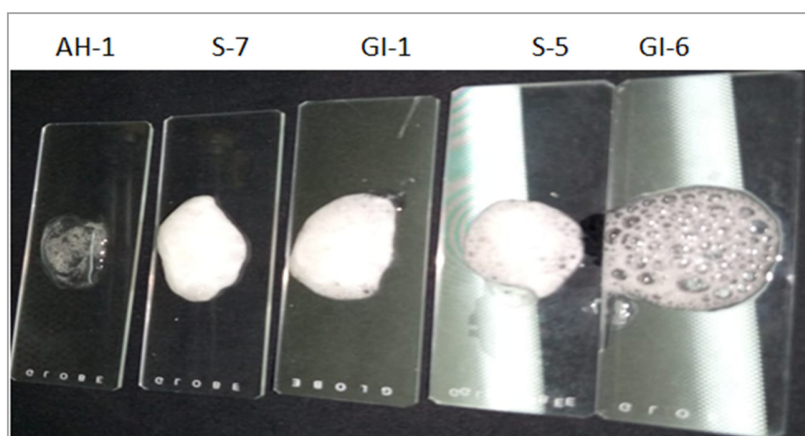

**Figure S1.** Catalase activity of the isolated strains.

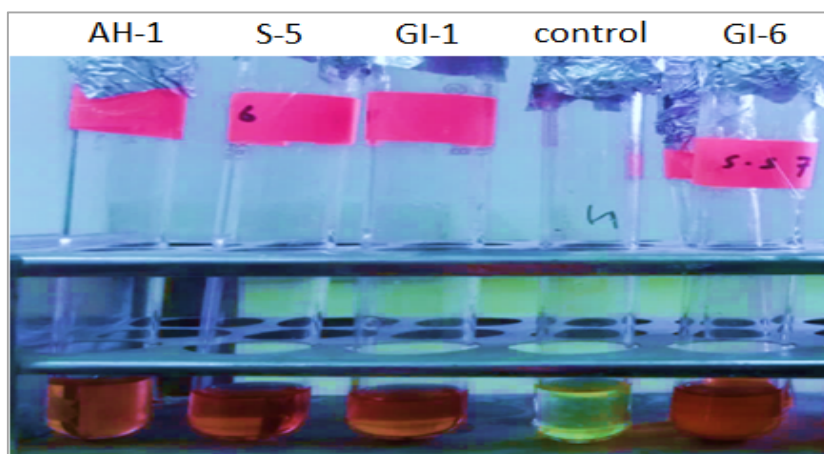

**Figure S2.** IAA production activity of the isolated strains

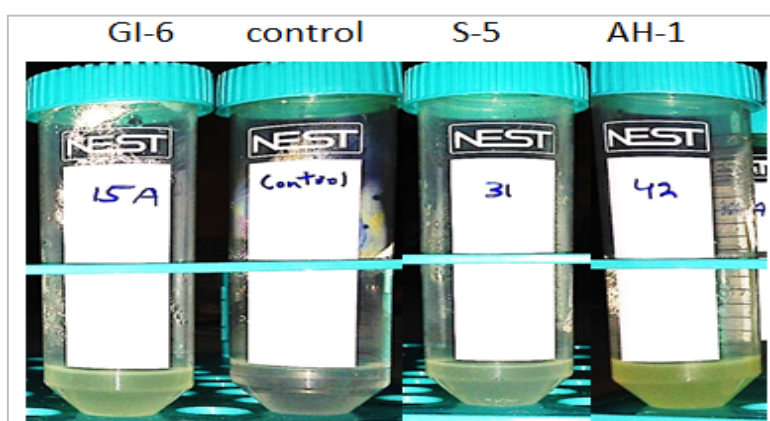

**Figure S3.** Nitrogen assimilation of isolated strains on Ashby N free media

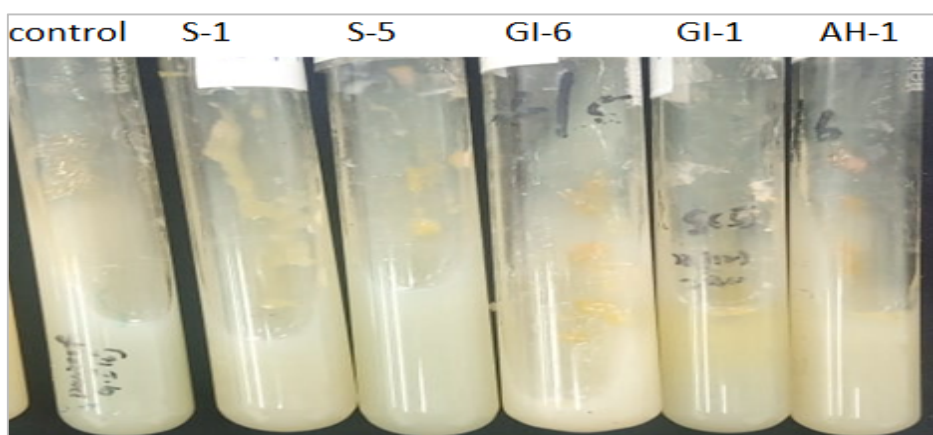

**Figure S4.** Nitrogen assimilation of isolated strains on Jensen N free agar media
